# Supplementary material for: Ultrafast and selective labeling of endogenous proteins using affinity-based benzotriazole chemistry
Source: Royal Society of Chemistry journal article supplement (doi:10.1039/d1sc05974b), 2022-01-01

**Figure 2a**

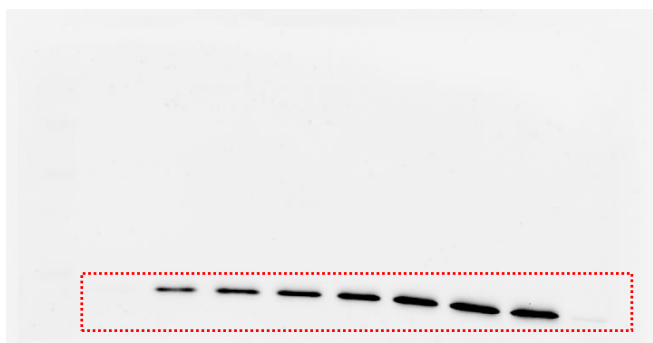

↑ **WB (SAv-HRP)** (Chemiluminescent image.)

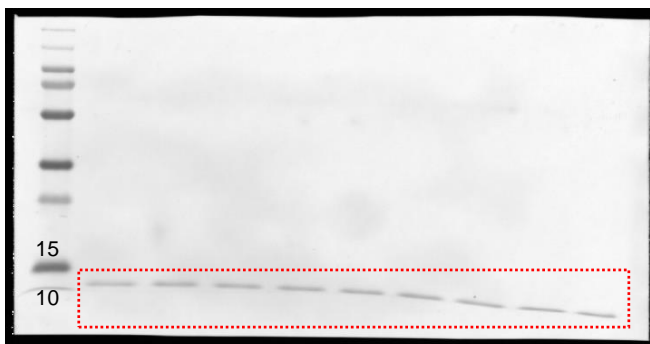

↑ **Ponceau S-stained blot**

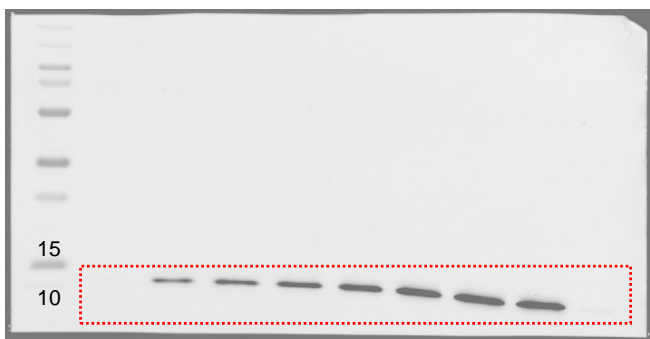

↑ **WB (SAv-HRP)** (Chemiluminescent image merged with colorimetric image.)

Figure 3a

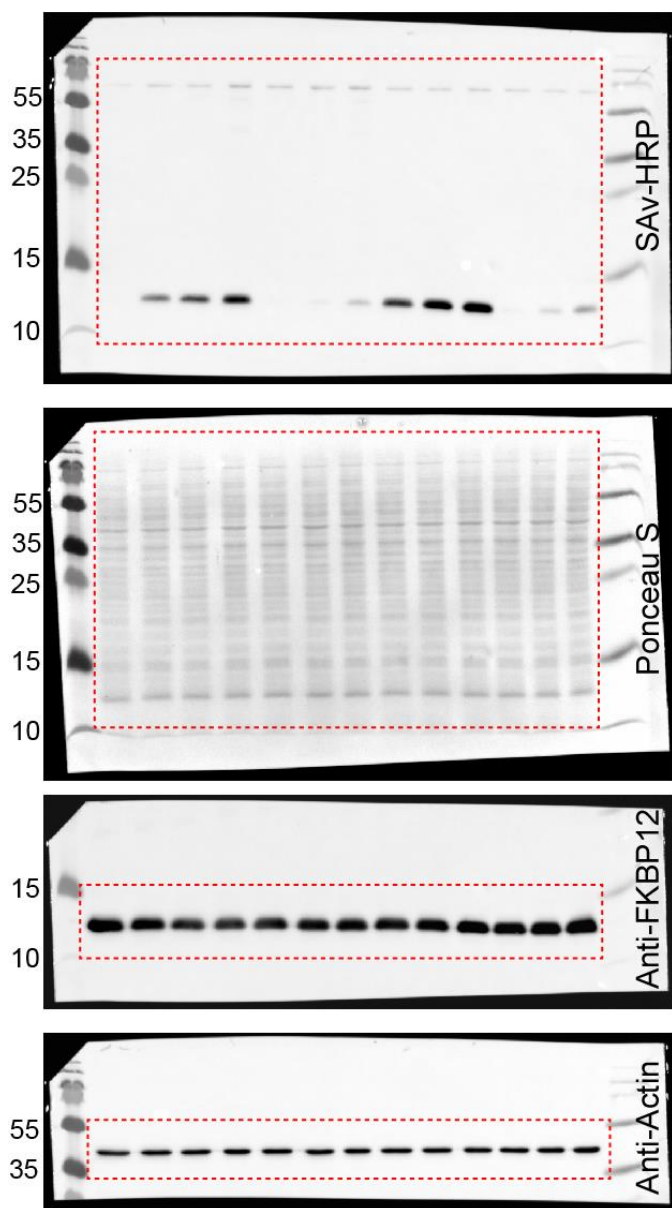

Figure 3b

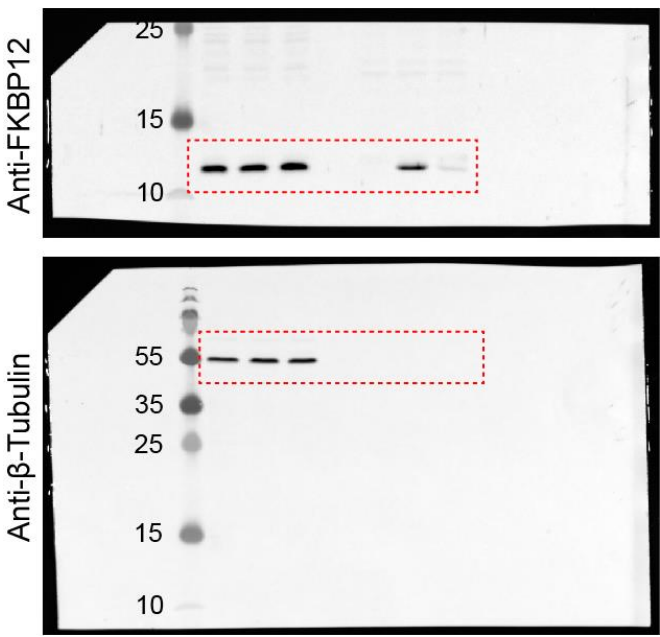

Figure 3c

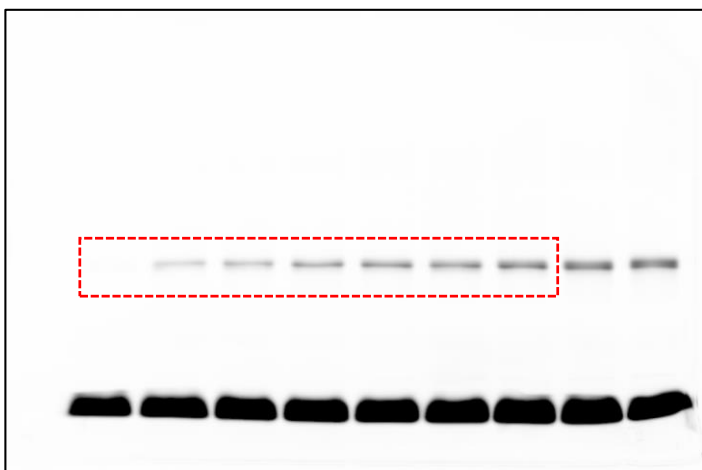

In-gel fluorescence

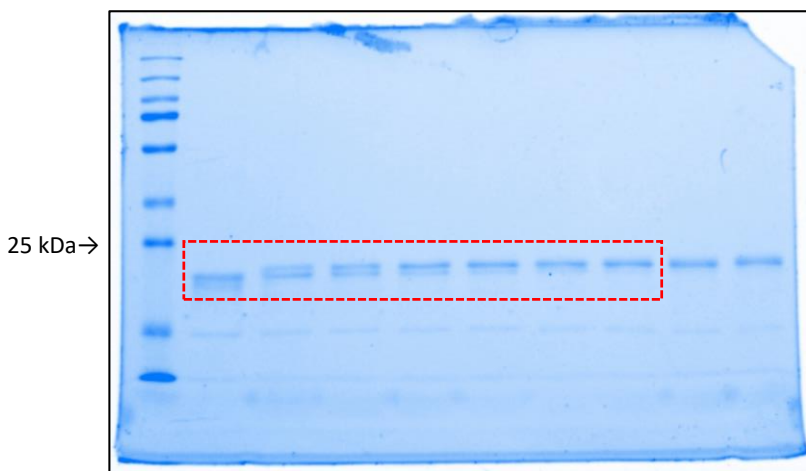

Coomassie brilliant blue staining

**Figure 4c**

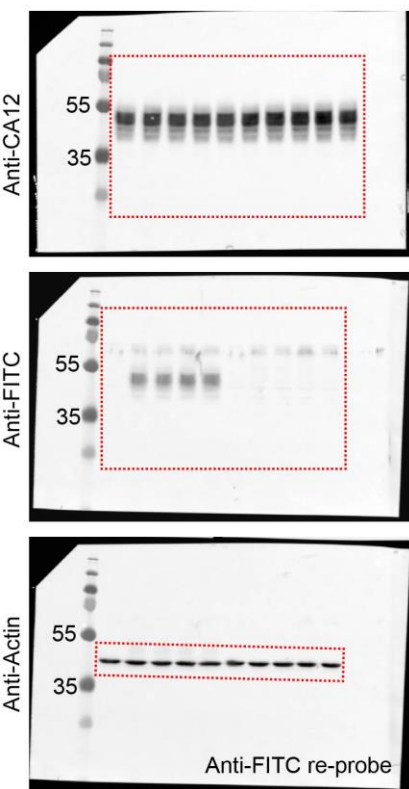

**Figure 4d**

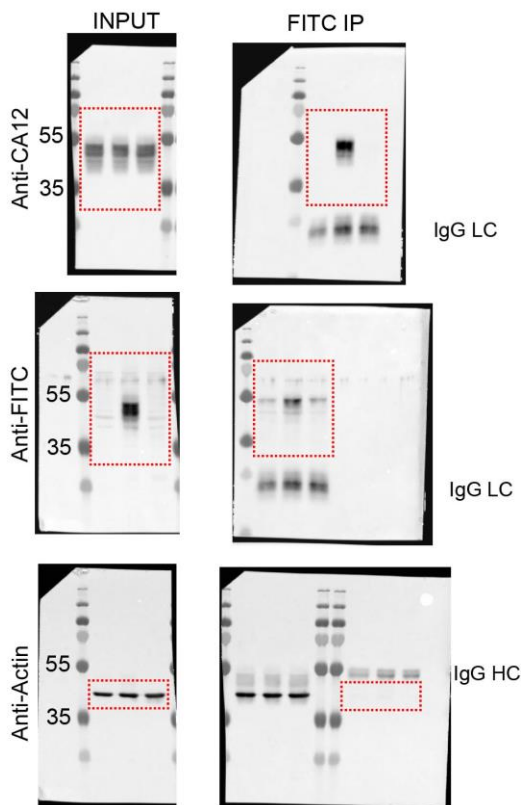

**Figure S1**

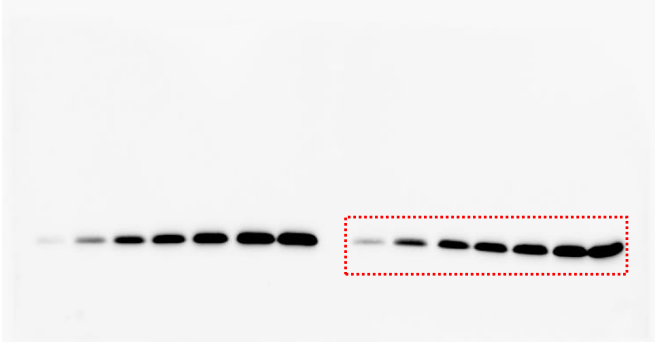

↑ **WB (SAv-HRP)** (Chemiluminescent image.)

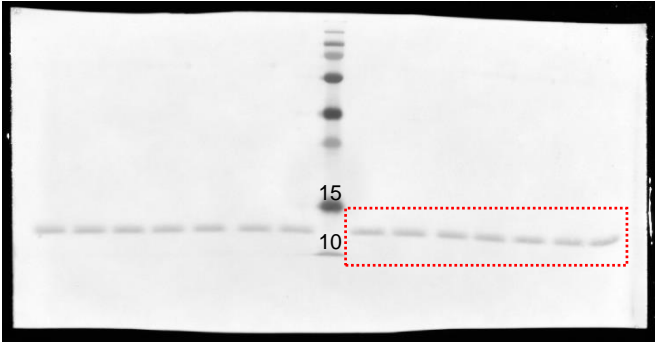

↑ **Ponceau S-stained blot**

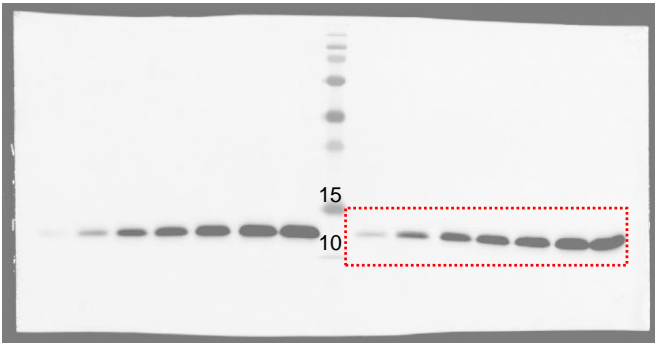

↑ **WB (SAv-HRP)** (Chemiluminescent image merged with colorimetric image.)

Figure S5

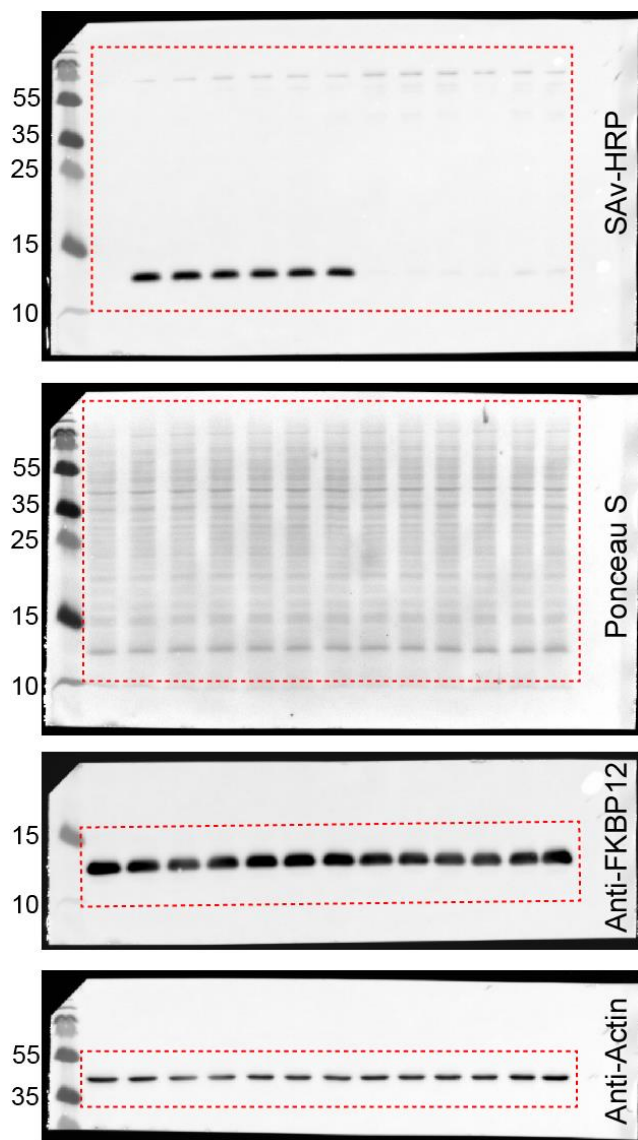

Supplement: d1sc05974b2.pdf [file d1sc05974b2.pdf]
